# Supplementary material for: Novel low-rank coal-based CDs for the detection of Fe 3+
Source: Royal Society of Chemistry journal article supplement (doi:10.1039/d5ay01773d), 2026-01-01
Supplement: d5ay01773d1.pdf [file d5ay01773d1.pdf]

## Supplementary Information for Journal of Analytical Methods

### A novel low-rank coal-based CDs for the detection of $\text{Fe}^{3+}$

Wenwen Wu, Xiang Han\*, Siyu Zhang, Lele Li, Meili Du, Fuxin Chen  
College of Chemistry and Chemical Engineering , Xi'an University of Science and  
Technology , Xi'an 710054,China

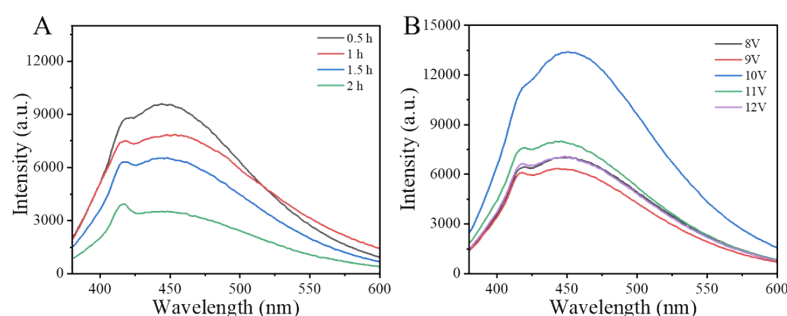

**Fig. S1: A: Fluorescence spectra of coal-based CDs prepared at different reaction times; B: Fluorescence spectra of coal-based carbon dots prepared at different voltages.**

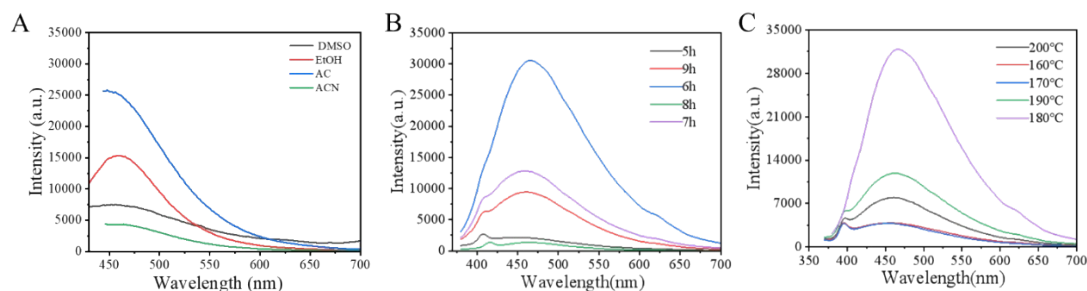

**Fig. S2: A: Coal-based CDs prepared by DMSO, EtOH, AC, ACN; B: Coal-based CDs prepared at different times C: Fluorescence spectra of coal-based CDs prepared at different temperatures.**

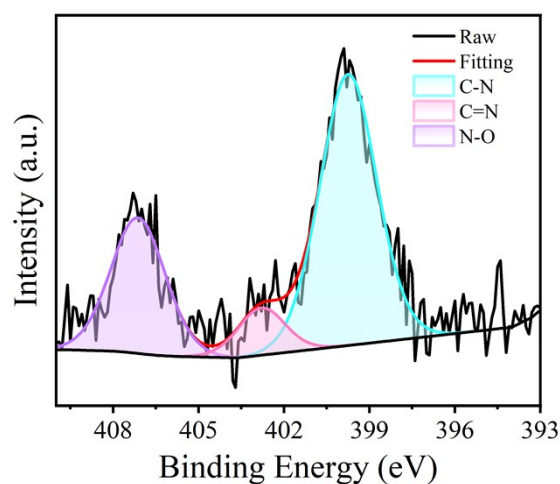

Fig. S3 The high-resolution N1s spectrum of CDs XPS.

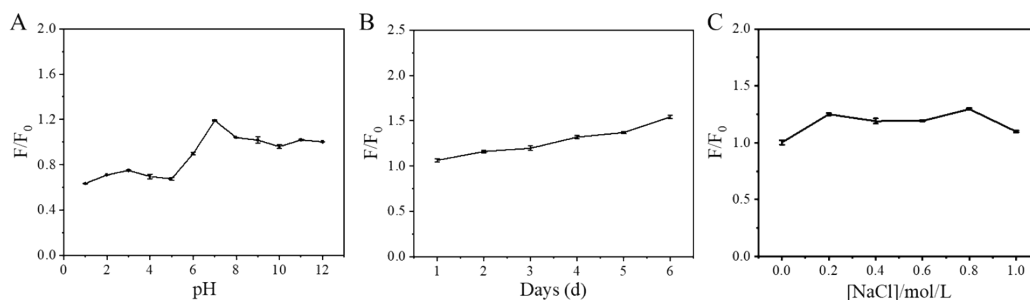

Fig. S4: A: The influence of pH on the fluorescence intensity of coal-based CDs; B: The influence of time on the fluorescence intensity of coal-based CDs; C: The influence of ion concentration on the fluorescence intensity of coal-based CDs.

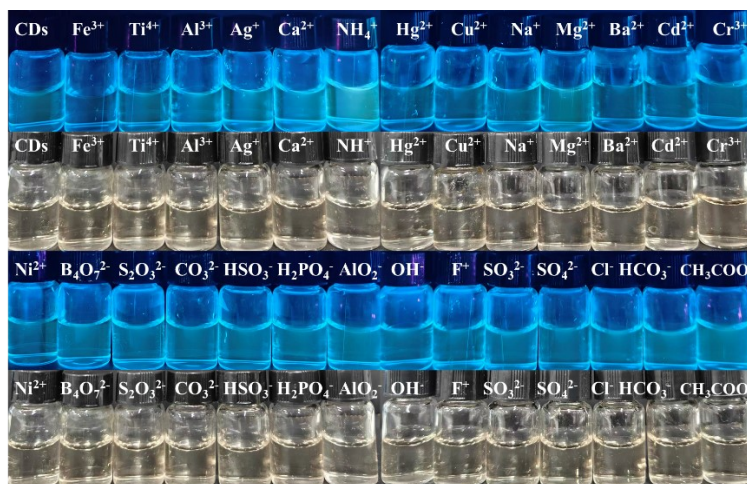

Fig. S5 Changes in color and fluorescence of CDs solution (100 $\mu$ M) upon addition of different ions (CDs,  $\text{Fe}^{3+}$ ,  $\text{Ti}^{4+}$ ,  $\text{Al}^{3+}$ ,  $\text{Ag}^+$ ,  $\text{Ca}^{2+}$ ,  $\text{NH}_4^+$ ,  $\text{Hg}^{2+}$ ,  $\text{Cu}^{2+}$ ,  $\text{Na}^+$ ,  $\text{Mg}^{2+}$ ,  $\text{Ba}^{2+}$ ,  $\text{Cd}^{2+}$ ,  $\text{Cr}^{3+}$ ,  $\text{Ni}^{2+}$ ,  $\text{B}_4\text{O}_7^-$ ,  $\text{S}_2\text{O}_3^{2-}$ ,  $\text{CO}_3^{2-}$ ,  $\text{HSO}_3^-$ ,  $\text{H}_2\text{PO}_4^-$ ,  $\text{AlO}_2^-$ ,  $\text{OH}^-$ ,  $\text{F}^-$ ,  $\text{SO}_3^{2-}$ ,  $\text{SO}_4^{2-}$ ,  $\text{Cl}^-$ ,  $\text{HCO}_3^-$ ,  $\text{CH}_3\text{COO}^-$ )

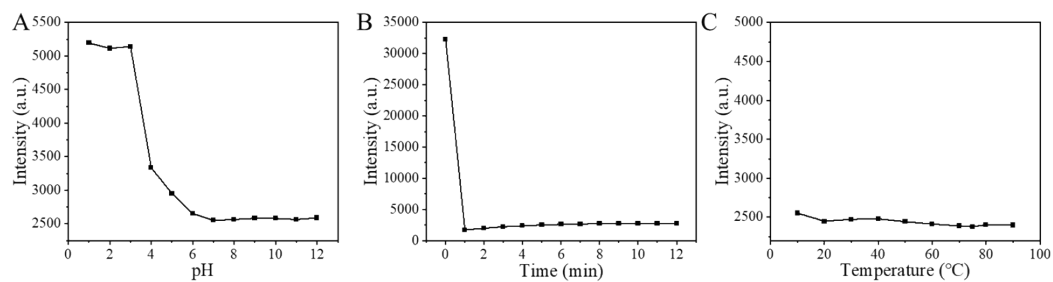

**Fig. S6 CDs at different (A) pH values; (B) Response time; (C) Temperature; The fluorescence intensity after adding  $\text{Fe}^{3+}$  under certain conditions.**

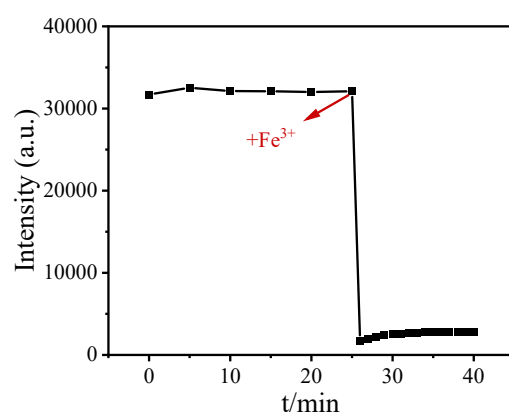

**Fig. S7 The fluorescence intensity of CDs before and after the addition of  $\text{Fe}^{3+}$  over time.**

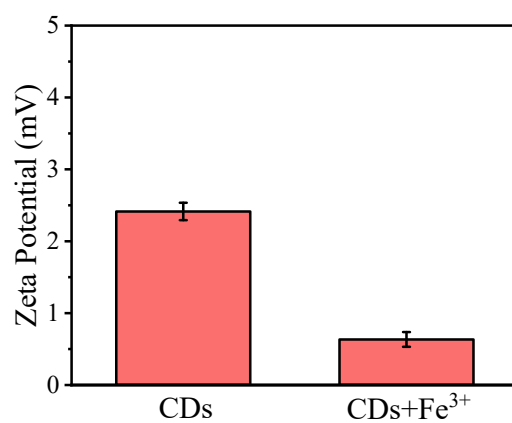

**Fig. S8 Zeta-Potential of CDs in the presence or absence of  $\text{Fe}^{3+}$**

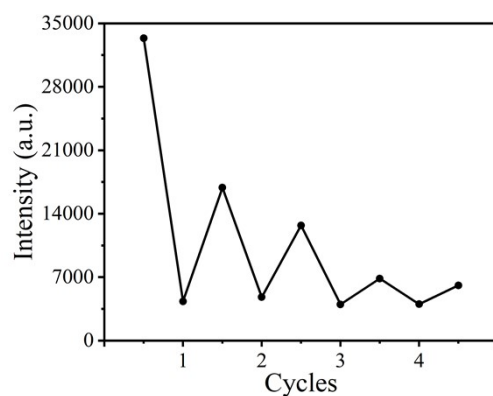

Fig.S9 Repeated on-off switching of the fluorescence emission of CDs in  $\text{SiO}_3^{2-}$  and  $\text{Fe}^{3+}$  solution cycles.

Table S1. Comparison of CDs with existing coal-based carbon points

| Carbon Precursor       | Synthesis method                                                                     | appliance                             | quantum yield | Ref.      |
|------------------------|--------------------------------------------------------------------------------------|---------------------------------------|---------------|-----------|
| coal-based humic acid  | solvent heat                                                                         | sensing of $\text{H}_2\text{O}_2$     | 7.6%          | S1        |
| Coal-based humic acid  | hydrothermal                                                                         |                                       | 14%           | S2        |
| Low-rank coal          | nitric acid oxidation                                                                | fluorescent inks                      | 9.11%         | S3        |
| Lignite                | ultrasound-assisted hydrogen peroxide                                                | Detection of $\text{Cr}^{6+}$         | 1.37%         | S4        |
| Anthracite and lignite | Sulfuric acid and nitric acid are mixed and oxidized                                 | Anti-counterfeiting                   | 1.62%         | S5        |
| raw coal               | Mixed oxidation of $\text{H}_2\text{O}_2$ and $\text{NH}_3 \cdot \text{H}_2\text{O}$ | Optoelectronic devices                | 8.9%          | S6        |
| coal washery rejects   |                                                                                      |                                       | 14.9%         |           |
| Coal                   | Mixed oxidation of $\text{H}_2\text{O}_2$ and $\text{HCOOH}$                         | Detection of $\text{Fe}^{3+}$         | 7.2%          | S7        |
| Lignite                | Oxidation of $\text{H}_2\text{O}_2$                                                  | Detection of $\text{Cu}^{2+}$         | 0.81%         | S8        |
| Coal pitch             | Mixed oxidation of $\text{H}_2\text{O}_2$ and $\text{HCOOH}$                         |                                       | 3.77%         | S9        |
| Coal pitch             | Hydrothermal in $\text{H}_2\text{O}_2$ and $\text{HCOOH}$ solution                   | LED                                   | 8.36%         | S10       |
| Lignite                | Chemical oxidation with $\text{H}_2\text{O}_2$                                       | Detection of $\text{Fe}^{3+}$ in soil | 23.49%        | This work |

**Table S2. Comparison of the Fe<sup>3+</sup> detection limit between CDs and the existing CDs**  
**detection**

| Carbon Precursor          | Synthesis method                                      | Detection object | Detection limit | Ref.      |
|---------------------------|-------------------------------------------------------|------------------|-----------------|-----------|
| citric acid               | hydrothermal                                          | Fe <sup>3+</sup> | 0.753 μM        | S11       |
| waste egg tray paper pulp | hydrothermal                                          | Fe <sup>3+</sup> | 1.418 μM        | S12       |
| methionine                | solvent heat                                          | Fe <sup>3+</sup> | 7.12μM          | S13       |
| citric acid               | solvent heat                                          | Fe <sup>3+</sup> | 4.5 μM          | S14       |
| sodium citrate            | hydrothermal                                          | Fe <sup>3+</sup> | 1.41 μM         | S15       |
| mushroom                  | hydrothermal                                          | Fe <sup>3+</sup> | 16 μM           | S16       |
| coffee grounds            | solvent heat                                          | Fe <sup>3+</sup> | 4.31 μM         | S17       |
| Lignite                   | Chemical oxidation with H <sub>2</sub> O <sub>2</sub> | Fe <sup>3+</sup> | 0.123 μM        | This work |

**Table S3. Detection of Fe<sup>3+</sup> present in the original soil at different pH levels**

| Sample        | pH value | Measured value of Fe <sup>3+</sup><br>(n=3) (μM) | Relative standard deviation (%) |
|---------------|----------|--------------------------------------------------|---------------------------------|
| Soil leachate | 2        | 0.79                                             | 1.52%                           |
|               | 4        | 0                                                | --                              |
|               | 6        | 0                                                | --                              |
|               | 8        | 0                                                | --                              |

- [S1] He Z, Yuen M, Zhang C, et al. Room-temperature phosphorescence in coal-based humic acid-derived carbon dots[J]. Journal of Materials Chemistry C, 2024, 12(17): 6333-6340.
- [S2] Song S, Wang Z, Pan C, et al. Achieving full-color emission in coal-based humic acid derived carbon dots through intradot aggregation[J]. Journal of Materials Chemistry C, 2022, 10(27): 10124-10131.
- [S3] Jiang W, He H, Wang C, et al. Preparation of coal-based carbon quantum dots and their fluorescence properties[J]. Microchemical Journal, 2024, 207: 111818.
- [S4] Xu S, Zhang J, Li M, et al. In situ synthesis of S-doped coal-based carbon quantum dots and its application to Cr<sup>6+</sup> detection[J]. Journal of Chemical Technology & Biotechnology, 2023, 98(10): 2532-2545.
- [S5] Du M, Wang C, Liu X, et al. Morphological insights into uncompetitive fluorescence of coal-based carbon dots and strategies for improvement[J]. Carbon, 2024, 228: 119396.
- [S6] Boruah A, Bora S, Thakur A, et al. Solid-state phosphors from coal-derived carbon quantum dots[J]. ACS omega, 2023, 8(28): 25410-25423.
- [S7] Cheng Z, Wu X, Liu L, et al. A highly efficient, rapid, room temperature synthesis method for coal-based water-soluble fluorescent carbon dots and its use in Fe<sup>3+</sup> ion detection[J]. New Carbon Materials, 2023, 38(6): 1104-1115.
- [S8] Shi C, Wei X Y, Liu F J, et al. Carbon Dots Derived from Facile Tailoring of Shaerhu Lignite as a Novel Fluorescence Sensor with High-Selectivity and Sensitivity for Cu<sup>2+</sup> Detection[J]. ChemistrySelect, 2020, 5(39): 12125-12130.
- [S9] Meng X, Chang Q, Xue C, et al. Full-colour carbon dots: from energy-efficient synthesis to concentration-dependent photoluminescence properties[J]. Chemical communications, 2017, 53(21): 3074-3077.
- [S10] Zheng Y, Ye S, Chang Q, et al. Tailoring the Optical Properties of Coal Pitch-Derived Carbon Dots by

Graphitization Controlling[J]. *Energy & Fuels*, 2024, 38(15): 14475-14482.

- [S11] Li B, Wu F, Xie Z, et al. High acid-base tolerance and long storage time lanthanum cerium co-doped carbon quantum dots for  $\text{Fe}^{3+}$  detection[J]. *Spectrochimica Acta Part A: Molecular and Biomolecular Spectroscopy*, 2025, 327: 125403.
- [S12] Mahilary B, Patir K, Kandinya R, et al. Waste Egg Tray Paper Pulp Derived Carbon Dots for Detection of  $\text{Fe}^{3+}$  Ions via Fluorescence On-Off Process[J]. *Journal of Fluorescence*, 2025: 1-10.
- [S13] Yang C, Xu G, Hou C, et al. Ratiometric fluorescence nanoprobe based on nitrogen-doped carbon dots for  $\text{Cu}^{2+}$  and  $\text{Fe}^{3+}$  detection[J]. *Scientific Reports*, 2025, 15(1): 6261.
- [S14] Jiang Y, Wang H, Nie T, et al. White-emissive boron and nitrogen co-doped carbon dots for detection of water in organic solvents and  $\text{Fe}^{3+}$  ions[J]. *Materials Today Communications*, 2025, 44: 111992.
- [S15] Guo S, Liang L, Guo Q, et al. Incorporating silicon-doped carbon dots into europium chelated silica microspheres for the ratiometric fluorescent and colorimetric detection of  $\text{Fe}^{3+}$  ions[J]. *Microchemical Journal*, 2025: 115194.
- [S16] Klongklaw K, Phiromkaew B, Kiatsuksri P, et al. Green one-step synthesis of mushroom-derived carbon dots as fluorescent sensors for  $\text{Fe}^{3+}$  detection[J]. *RSC advances*, 2023, 13(44): 30869-30875.
- [S17] Zhang B, Liu Z, Qian D, et al. Application of polyamide 66 nanofiber membrane loaded with coffee grounds carbon dots in  $\text{Fe}^{3+}$  detection[J]. *Spectrochimica Acta Part A: Molecular and Biomolecular Spectroscopy*, 2025, 328: 125440.
